# Supplementary material
Source: PubMed Central journal article supplement (PMC3629779)
Supplement: Supp_Fig1.pdf [file Supp_Fig1.pdf]

## Supplementary Data

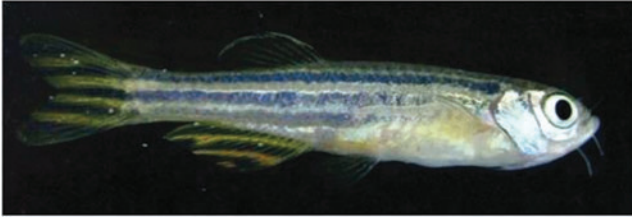

**SUPPLEMENTARY FIG. S1.** Image of the adult wild zebrafish used for the genome sequencing.
