# Supplementary material
Source: PubMed Central journal article supplement (PMC3629779)
Supplement: Supp_Fig3.pdf [file Supp_Fig3.pdf]

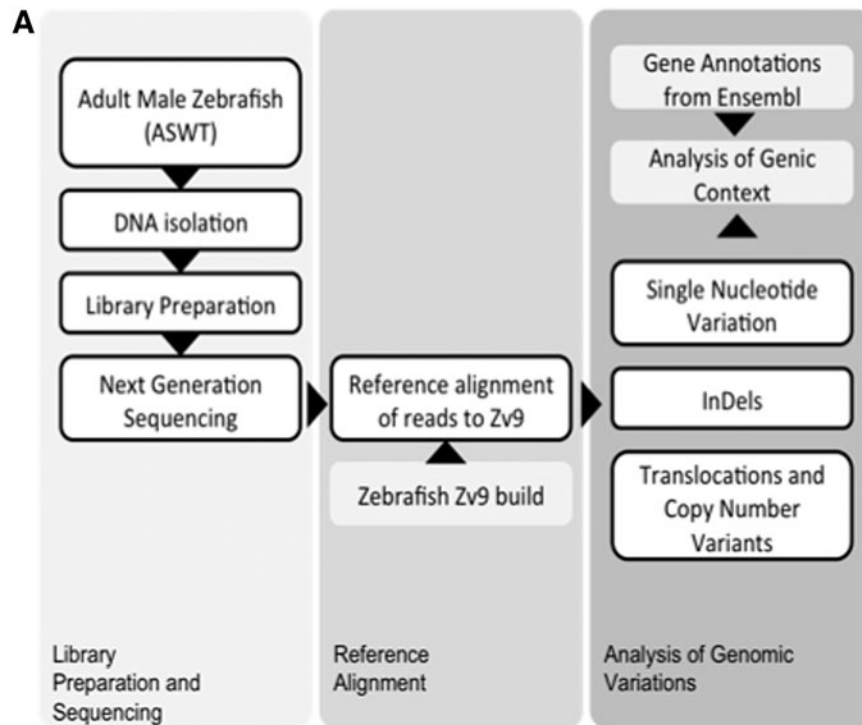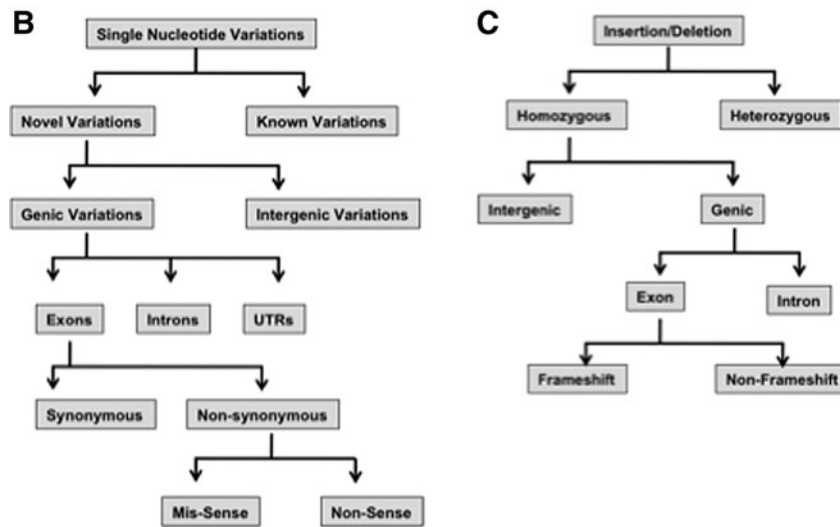

**SUPPLEMENTARY FIG. S3.** Schematic representation of the computational analysis pipeline followed for the ASWT zebrafish genome. **(A)** Overview of the library preparation, sequence generation, reference assembly, and analysis of genomic variations. Overview of the annotation pipeline for **(B)** single nucleotide variations and **(c)** insertion–deletion.
